# Supplementary material for: Fingerprint region of the formic acid dimer: variational vibrational computations in curvilinear coordinates
Source: Royal Society of Chemistry journal article supplement (doi:10.1039/d0cp06289h), 2021-01-01
Supplement: d0cp06289h1.pdf [file d0cp06289h1.pdf]

SUPPLEMENTARY INFORMATION TO  
**Fingerprint region of the formic acid dimer: variational  
vibrational computations in curvilinear coordinates**

Alberto Martín Santa Daría,<sup>1</sup> Gustavo Avila,<sup>1</sup> and Edit Mátyus<sup>1,\*</sup>

<sup>1</sup>*Institute of Chemistry, ELTE Eötvös Loránd University,  
Pázmány Péter sétány 1/A, 1117 Budapest, Hungary*

(Dated: February 3, 2021)

Contents:

S1. Normal coordinate definition (p. 2–4)

S2. Curvilinear normal coordinate definition (p. 5)

S3. Wave function plots of the 8D( $\mathcal{I}t$ ) vibrational model (p. 6–20)

---

\* [edit.matyus@ttk.elte.hu](mailto:edit.matyus@ttk.elte.hu)

TABLE I. Normal coordinate definition of FAD corresponding to the QB16-PES: equilibrium structure,  $c_{i\alpha}$  in bohr with  $i = 1(\text{H}^{(A)}), 2(\text{H}^{(A)}), 5(\text{O}^{(A)}), 6(\text{O}^{(A)}), 9(\text{C}^{(A)}), 3(\text{H}^{(B)}), 4(\text{H}^{(B)}), 7(\text{O}^{(B)}), 8(\text{O}^{(B)}), 10(\text{C}^{(B)})$  and  $\alpha = x, y, z$ , and  $l_{\alpha i, j}$  elements used to calculate the  $Q_j$  dimensionless normal coordinates ( $j = 1, \dots, 24$ ). The harmonic frequencies,  $\tilde{\nu}^{\text{HO}}$  in  $\text{cm}^{-1}$ , are also given in the table.  $r_{i\alpha} = c_{i\alpha} + \sum_{j=1}^{24} Q_j l_{\alpha i, j}$

|                           | $Q_1$             | $Q_2$         | $Q_3$         | $Q_4$         | $Q_5$         | $Q_6$         | $Q_7$         | $Q_8$         |
|---------------------------|-------------------|---------------|---------------|---------------|---------------|---------------|---------------|---------------|
| $\tilde{\nu}^{\text{HO}}$ | 70.079            | 169.973       | 170.393       | 208.841       | 253.821       | 275.148       | 692.643       | 715.565       |
|                           | $l_{\alpha i, j}$ |               |               |               |               |               |               |               |
| $c_{1x}$                  | 0                 | -0.0550489068 | 0             | -0.0221897688 | 0             | 0.1027336927  | 0.0106811053  | 0.0078803994  |
| $c_{1y}$                  | 0.0888640999      | 0             | -0.3653231756 | 0             | -0.2807202366 | 0             | 0             | 0             |
| $c_{1z}$                  | 0                 | 0.0195732544  | 0             | -0.0809832850 | 0             | 0.0110746966  | -0.0364919882 | -0.0370286239 |
| $c_{2x}$                  | -2.1440160385     | 0.0678179381  | 0             | 0.0208023614  | 0             | -0.0608445441 | 0.1078648560  | 0.0925684085  |
| $c_{2y}$                  | 0                 | 0.0306454227  | 0             | 0.1749988335  | 0             | 0.0906722954  | 0             | 0             |
| $c_{2z}$                  | -0.8915699548     | 0             | 0.1081730397  | 0             | -0.0595051283 | 0             | -0.0790462710 | 0.0205304089  |
| $c_{3x}$                  | -2.1349725967     | 0.0508401068  | 0             | 0.01271590328 | 0             | -0.0029861332 | 0.0369000130  | 0.0364542139  |
| $c_{3y}$                  | 0.1530793141      | 0             | 0.0551154157  | 0             | 0.0477433605  | 0             | 0             | 0             |
| $c_{3z}$                  | -2.7675548795     | 0.1027221555  | 0             | -0.0512142095 | 0             | -0.0756204105 | 0.0175902254  | 0.0155037351  |
| $c_{6x}$                  | 2.1002784911      | 0.0706620794  | 0             | 0.0178761714  | 0             | -0.0029895689 | -0.0407039395 | -0.0425354587 |
| $c_{6y}$                  | 0                 | -0.1715444148 | 0             | 0.0324005323  | 0             | 0.0615425686  | 0             | 0             |
| $c_{6z}$                  | -2.2930907605     | 0.0503750205  | 0             | -0.0967866341 | 0             | 0.0748243895  | 0.0136926724  | 0.0136488812  |
| $c_{9x}$                  | 0.2020375225      | 0.0182073300  | 0             | 0.0111036095  | 0             | 0.0279448602  | -0.0002598622 | -0.0003293917 |
| $c_{9y}$                  | 0.0156158809      | 0             | -0.1007967531 | 0             | -0.0661305556 | 0             | 0             | 0             |
| $c_{9z}$                  | -3.5929593001     | 0.0223423640  | 0             | -0.0795590666 | 0             | 0.0067828274  | -0.0376791855 | -0.0372458161 |
| $c_{3x}$                  | -0.2868649484     | 0.0550477261  | 0             | 0.0221796487  | 0             | 0.1027432996  | -0.0106806258 | 0.0078747894  |
| $c_{3y}$                  | 0                 | 0.0881415843  | 0             | -0.3655592754 | 0             | 0.2804082358  | 0             | 0             |
| $c_{3z}$                  | 5.6564793125      | 0.0195862102  | 0             | 0.0809913977  | 0             | -0.0110710456 | 0.0364889326  | -0.0370303283 |
| $c_{4x}$                  | 2.1440156985      | 0.0678024450  | 0             | -0.0208138591 | 0             | -0.0608542506 | 0.1078602975  | 0.0925736468  |
| $c_{4y}$                  | 0.0306891267      | 0             | 0.1751452961  | 0             | -0.0905441001 | 0             | 0             | 0             |
| $c_{4z}$                  | 0.8915695806      | 0.01081715038 | 0             | 0.0595137351  | 0             | -0.0790584397 | -0.0205293799 | 0.0182076727  |
| $c_{7x}$                  | 2.1349725840      | 0.0508269012  | 0             | -0.0127196509 | 0             | -0.0029895689 | -0.0368983293 | 0.0364558854  |
| $c_{7y}$                  | 0.1528925491      | 0             | 0.0552385319  | 0             | 0.0477007959  | 0             | 0             | 0             |
| $c_{7z}$                  | 2.7675545069      | 0.1027219292  | 0             | 0.0512231448  | 0             | -0.0756320465 | -0.0175891492 | 0.0155038045  |
| $c_{8x}$                  | -2.1002785866     | 0.0706452307  | 0             | -0.0178800062 | 0             | -0.0206223309 | 0.0407027015  | -0.0425372096 |
| $c_{8y}$                  | -0.1720339853     | 0.0325403496  | 0             | 0.0967988803  | 0             | -0.0615074767 | 0             | 0             |
| $c_{8z}$                  | 2.2930911271      | 0.0503506096  | 0             | 0.0967988803  | 0             | 0.0748289406  | -0.0136918211 | 0.01366503538 |
| $c_{10x}$                 | -0.2020373912     | 0.0181990479  | 0             | -0.0111065313 | 0             | 0.0279449116  | 0.0002605854  | -0.0003293482 |
| $c_{10y}$                 | 0.0151332334      | 0.1007865686  | 0             | 0.1007865686  | 0             | -0.0660394431 | 0             | 0             |
| $c_{10z}$                 | 3.5929593354      | 0.0223551486  | 0             | 0.0795697925  | 0             | 0.0067792673  | 0.0376772774  | -0.0372472399 |

(Table I continued.)

|                 | $Q_9$               | $Q_{10}$      | $Q_{11}$      | $Q_{12}$      | $Q_{13}$       | $Q_{14}$       | $Q_{15}$      | $Q_{16}$      |  |
|-----------------|---------------------|---------------|---------------|---------------|----------------|----------------|---------------|---------------|--|
| $i^{\text{HO}}$ | 955.687             | 969.635       | 1083.808      | 1099.884      | 1254.880       | 1257.923       | 1405.225      | 1407.720      |  |
|                 | $l_{\alpha_i, j}$ : |               |               |               |                |                |               |               |  |
| $c_{1x}$        | 0                   | 0             | 0             | 0             | 0.0662994950   | 0.0769799509   | 0.1502666881  | 0.1765604364  |  |
| $c_{1y}$        | -0.0247296491       | -0.0473246894 | 0.1775679438  | 0.1730731049  | 0              | 0              | 0             | 0             |  |
| $c_{1z}$        | 0                   | 0             | 0             | -0.0249575215 | -0.02444924822 | 0.0323523955   | 0.0266266895  | 0.0266266895  |  |
| $c_{2x}$        | 0                   | 0             | 0             | 0             | 0.0087695806   | 0.07928842517  | 0.0766030777  | 0.0349121374  |  |
| $c_{2y}$        | 0.2324148735        | 0.2089462462  | 0.0600001271  | 0.0997235577  | 0              | 0              | 0             | 0             |  |
| $c_{2z}$        | 0                   | 0             | 0             | 0             | 0.0146295325   | 0.01710606874  | -0.0023710258 | 0.0054412768  |  |
| $c_{3x}$        | 0                   | 0             | 0             | -0.0336695746 | -0.03296837622 | 0.0047141652   | 0.0035566887  | 0.0035566887  |  |
| $c_{3y}$        | -0.0161034747       | -0.0173582869 | 0.0050915586  | 0.0020338197  | 0              | 0              | 0             | 0             |  |
| $c_{3z}$        | 0                   | 0             | 0             | 0             | 0.0137056925   | 0.01166829919  | -0.0053390700 | -0.0016912302 |  |
| $c_{6x}$        | 0                   | 0             | 0             | 0             | 0.0109360953   | 0.00973205227  | -0.0059207954 | -0.0050318977 |  |
| $c_{6y}$        | -0.0024295085       | -0.0128374699 | 0.0103028971  | 0.0062705186  | 0              | 0              | 0             | 0             |  |
| $c_{6z}$        | 0                   | 0             | 0             | 0             | 0.0090163634   | 0.00873518298  | -0.0129775345 | -0.0137694463 |  |
| $c_{9x}$        | 0                   | 0             | 0             | 0             | 0.0212475911   | 0.01783137223  | -0.0174254883 | -0.0147863586 |  |
| $c_{9y}$        | 0.0170175144        | 0.0266679760  | -0.0386850254 | -0.0339475088 | 0              | 0              | 0             | 0             |  |
| $c_{9z}$        | 0                   | 0             | 0             | 0             | -0.0261151862  | -0.02655809320 | 0.0218634733  | 0.014948154   |  |
| $c_{3x}$        | 0                   | 0             | 0             | 0             | -0.0662239388  | 0.07701977435  | 0.1486994568  | -0.177910191  |  |
| $c_{3y}$        | 0.0248697099        | -0.0472670316 | -0.1776665890 | 0.1729598319  | 0              | 0              | 0             | 0             |  |
| $c_{3z}$        | 0                   | 0             | 0             | 0             | 0.0249324436   | -0.02447678207 | 0.0321180788  | -0.026904760  |  |
| $c_{4x}$        | 0                   | 0             | 0             | 0             | -0.0686967410  | 0.07935782541  | 0.0763111573  | -0.035554441  |  |
| $c_{4y}$        | -0.2330859635       | 0.2081969713  | -0.0600960861 | 0.0996775320  | 0              | 0              | 0             | 0             |  |
| $c_{4z}$        | 0                   | 0             | 0             | 0             | -0.0146126018  | 0.01711941275  | -0.0024192361 | -0.005424255  |  |
| $c_{7x}$        | 0                   | 0             | 0             | 0             | 0.0336369793   | -0.03300183542 | 0.0046828284  | -0.0003595615 |  |
| $c_{7y}$        | 0.0161600581        | -0.0173094723 | -0.0050906410 | 0.0020308739  | 0              | 0              | 0             | 0             |  |
| $c_{7z}$        | 0                   | 0             | 0             | 0             | -0.0136938047  | 0.01168167391  | -0.0053256537 | 0.001732898   |  |
| $c_{8x}$        | 0                   | 0             | 0             | 0             | -0.0109262153  | 0.00974346038  | -0.0058748507 | 0.005085181   |  |
| $c_{8y}$        | 0.0024723498        | -0.0128328944 | -0.0103056654 | 0.0062635652  | 0              | 0              | 0             | 0             |  |
| $c_{8z}$        | 0                   | 0             | 0             | 0             | -0.00900076076 | 0.00874641848  | -0.0128548521 | 0.013883743   |  |
| $c_{10x}$       | 0                   | 0             | 0             | 0             | -0.0212296035  | 0.01785354480  | -0.0172972349 | 0.014933437   |  |
| $c_{10y}$       | -0.0171025155       | 0.0266218433  | 0.0387047148  | -0.0339245550 | 0              | 0              | 0             | 0             |  |
| $c_{10z}$       | 0                   | 0             | 0             | 0             | 0.0260887832   | -0.02658517678 | 0.0217335486  | -0.015133642  |  |

(Table I continued.)

|                 | $Q_{17}$            | $Q_{18}$      | $Q_{19}$      | $Q_{20}$      | $Q_{21}$      | $Q_{22}$       | $Q_{23}$      | $Q_{24}$      |
|-----------------|---------------------|---------------|---------------|---------------|---------------|----------------|---------------|---------------|
| $p^{\text{HO}}$ | 1447.463            | 1480.190      | 1713.868      | 1778.743      | 3094.003      | 3095.465       | 3231.252      | 3325.172      |
|                 | $l_{\alpha_i, j}$ : |               |               |               |               |                |               |               |
| $c_{1x}$        | 0.2868654398        | 0.0539458530  | -0.0271137400 | 0.0294157509  | -0.0068577124 | 0.00690398212  | -0.0036229233 | -0.0006193951 |
| $c_{1y}$        | 0                   | 0             | 0             | 0             | 0             | 0              | 0             | 0             |
| $c_{1z}$        | -5.6564792624       | -0.0095596860 | 0.0230512400  | -0.0176567618 | 0.1336263016  | 0.13096390621  | 0.0074510990  | 0.0132394726  |
| $c_{2x}$        | -2.1440160385       | -0.1520891779 | -0.1613601303 | 0.0507020049  | -0.0012160887 | 0.00024199369  | -0.0056173447 | -0.0058632848 |
| $c_{2y}$        | 0                   | 0             | 0             | 0             | 0             | 0              | 0             | 0             |
| $c_{2z}$        | -0.8915699548       | 0.0015851962  | -0.0125699147 | -0.0021036311 | -0.0078113561 | 0.01374766678  | 0.1310048828  | 0.1290683147  |
| $c_{3x}$        | -2.1349725967       | 0.0017714739  | -0.0059881835 | 0.0071063221  | -0.0000570353 | 0.00007000256  | -0.0004064703 | 0.0004206479  |
| $c_{3y}$        | 0                   | 0             | 0             | 0             | 0             | 0              | 0             | 0             |
| $c_{3z}$        | -2.7675548795       | 0.0134229069  | -0.0009824420 | 0.0007835486  | 0.0005762451  | -0.00101054142 | -0.0083322496 | -0.0082008171 |
| $c_{6x}$        | 2.1002784911        | 0.0086457275  | -0.0125342624 | -0.0203379601 | 0.0003841836  | -0.00021343281 | -0.0011630504 | 0.0001235220  |
| $c_{6y}$        | 0                   | 0             | 0             | 0             | 0             | 0              | 0             | 0             |
| $c_{6z}$        | -2.2930907605       | 0.0073392025  | -0.0038895304 | -0.0146475416 | 0.0003754058  | -0.00018770156 | -0.0008181932 | 0.0001143304  |
| $c_{9x}$        | 0.2020375225        | 0.0194227157  | 0.0345250080  | -0.0371287112 | 0.0002009448  | -0.00040886758 | 0.0025824167  | -0.0001807620 |
| $c_{9y}$        | 0                   | 0             | 0             | 0             | 0             | 0              | 0             | 0             |
| $c_{9z}$        | -3.5929593001       | 0.0085878496  | -0.0099552073 | 0.0225977040  | -0.0117622828 | 0.01143198020  | -0.0005022856 | -0.0011721340 |
| $c_{3z}$        | -0.2868649484       | -0.1014723075 | -0.0539182353 | 0.0271121764  | 0.0067396231  | 0.00701871764  | 0.0036224445  | -0.0006193446 |
| $c_{3y}$        | 0                   | 0             | 0             | 0             | 0             | 0              | 0             | 0             |
| $c_{4x}$        | 5.6564793125        | 0.0048307456  | 0.0095549130  | -0.0230507487 | -0.1313978519 | -0.13319919832 | -0.0074485992 | 0.0132389046  |
| $c_{4z}$        | 2.1440156985        | 0.1521756753  | 0.1612764888  | -0.0506980876 | 0.0012117706  | 0.00026242782  | 0.0056168386  | -0.0058647308 |
| $c_{4y}$        | 0                   | 0             | 0             | 0             | 0             | 0              | 0             | 0             |
| $c_{4z}$        | 0.8915695806        | -0.0071893064 | -0.0015809639 | 0.0125692787  | 0.0075769931  | 0.01387625596  | -0.1309923064 | 0.1290810446  |
| $c_{7x}$        | 2.1349725840        | -0.0027695478 | -0.0017703710 | 0.0059882525  | 0.0000558376  | 0.00007096286  | 0.0004065357  | 0.0004206417  |
| $c_{7y}$        | 0                   | 0             | 0             | 0             | 0             | 0              | 0             | 0             |
| $c_{7z}$        | 2.7675545069        | -0.0136455848 | -0.0134166519 | 0.0009823348  | -0.0005590306 | -0.00102001048 | 0.0083313875  | -0.0082015189 |
| $c_{8x}$        | -2.1002785866       | 0.0086495091  | 0.0125302330  | 0.0203386057  | -0.0003804949 | -0.00021986770 | 0.0011630137  | 0.0001234232  |
| $c_{8y}$        | 0                   | 0             | 0             | 0             | 0             | 0              | 0             | 0             |
| $c_{8z}$        | 2.2930911271        | 0.0073371909  | 0.0038873291  | 0.0146478186  | -0.0003721938 | -0.00019400829 | 0.0008181618  | 0.0001142268  |
| $c_{10x}$       | -0.2020373912       | -0.0120840852 | -0.0194152472 | -0.0345258830 | -0.0001939268 | -0.00041227494 | -0.0025823641 | -0.0001805188 |
| $c_{10y}$       | 0                   | 0             | 0             | 0             | 0             | 0              | 0             | 0             |
| $c_{10z}$       | 3.5929593354        | 0.0085976123  | 0.0099501442  | -0.0225979539 | 0.0115676507  | 0.01162842543  | 0.0005020965  | -0.0011721186 |

TABLE II. Curvilinear normal coordinate definition of FAD corresponding to the QB16-PES and the internal coordinate definition of Sec. II.A: equilibrium value of the internal coordinates  $\xi_i^{(\text{eq})}$  with  $i = 1, \dots, 6$  and  $\mathcal{L}_{i,j}$  coefficients ( $j = 1, \dots, 6$ ) corresponding to the  $\mathcal{Q}_j$  curvilinear normal coordinates. The harmonic frequencies,  $\tilde{\nu}^{\text{HO}}$  in  $\text{cm}^{-1}$ , are also given in the table.  $\xi_i = \xi_i^{(\text{eq})} + \sum_{j=1}^6 \mathcal{Q}_j \mathcal{L}_{i,j}$

|                           |                       | $\mathcal{Q}_1$ | $\mathcal{Q}_2$ | $\mathcal{Q}_3$ | $\mathcal{Q}_4$ | $\mathcal{Q}_5$ | $\mathcal{Q}_6$ |
|---------------------------|-----------------------|-----------------|-----------------|-----------------|-----------------|-----------------|-----------------|
| $\tilde{\nu}^{\text{HO}}$ |                       | 65.757          | 155.438         | 160.447         | 222.384         | 262.267         | 328.281         |
|                           | $\mathcal{L}_{i,j}$ : |                 |                 |                 |                 |                 |                 |
| $R$                       | 5.6805167586          | 0               | -0.0000000490   | 0               | 0.1480298121    | 0.0078114080    | 0               |
| $\cos \theta$             | -0.3330272401         | 0               | -0.0344289689   | 0               | 0.0119751350    | -0.0482796603   | 0               |
| $\phi$                    | 4.7123889804          | 0.0890745125    | 0               | 0.0926450828    | 0               | 0               | 0.0616821979    |
| $\alpha$                  | 3.1415926536          | 0.0101279780    | 0               | -0.1158548265   | 0               | 0               | 0.0947600155    |
| $\cos \beta$              | 0.3330274046          | 0               | -0.0344289590   | 0               | -0.0119753490   | 0.0482796630    | 0               |
| $\gamma$                  | 1.5707963268          | -0.0931639847   | 0               | 0.0759836591    | 0               | 0               | 0.0692761166    |

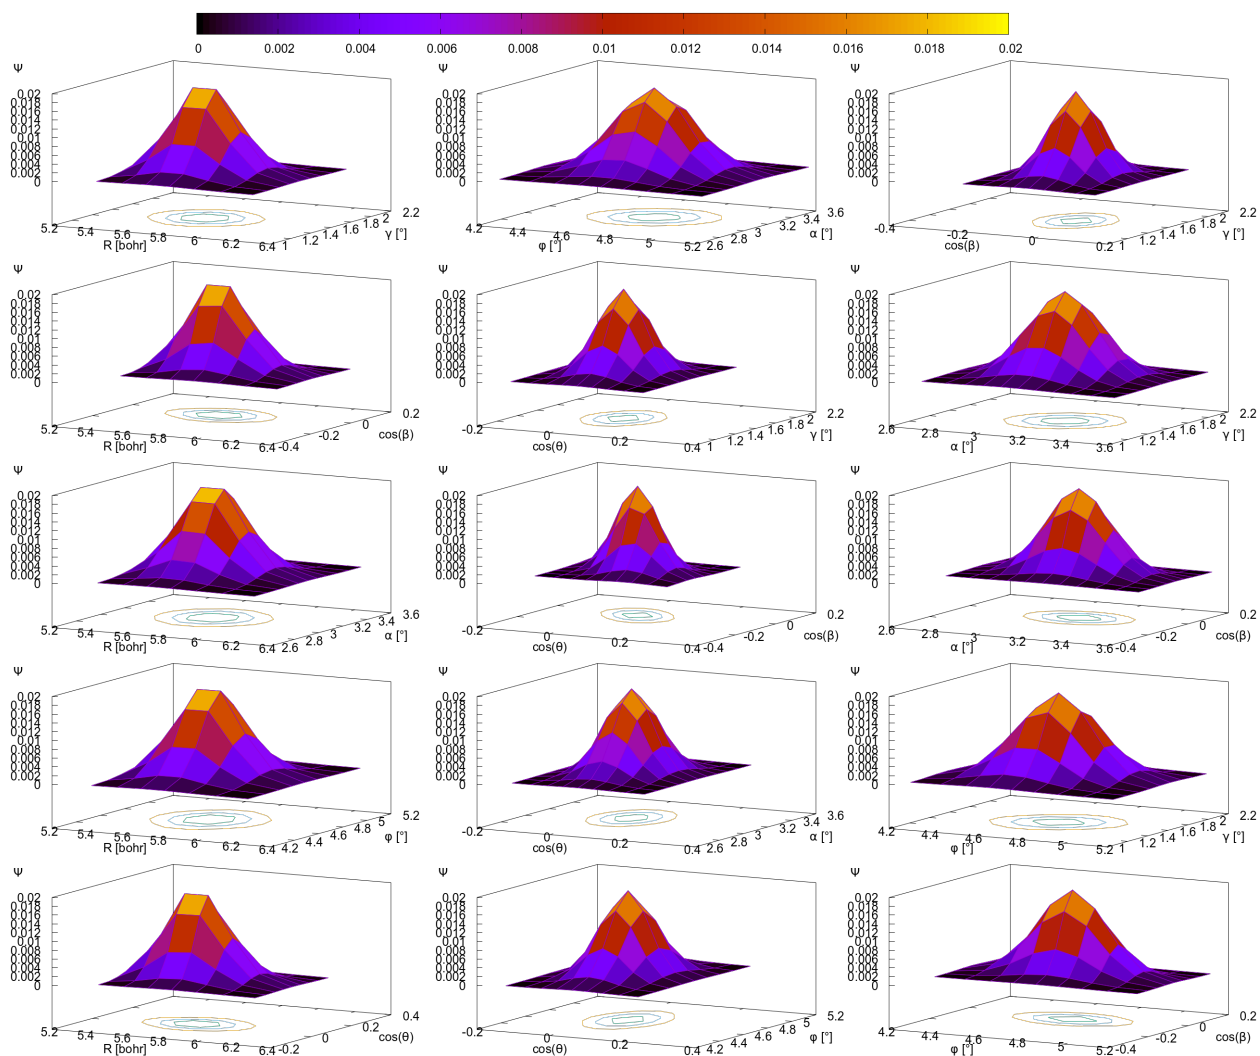

FIG. 1.  $\Psi_0$  with  $\tilde{\nu}_0 = 1532.9 \text{ cm}^{-1}$  obtained with GENIUSH using the  $8D(\mathcal{I}t)$  curvilinear KEO and the QB16-PES.

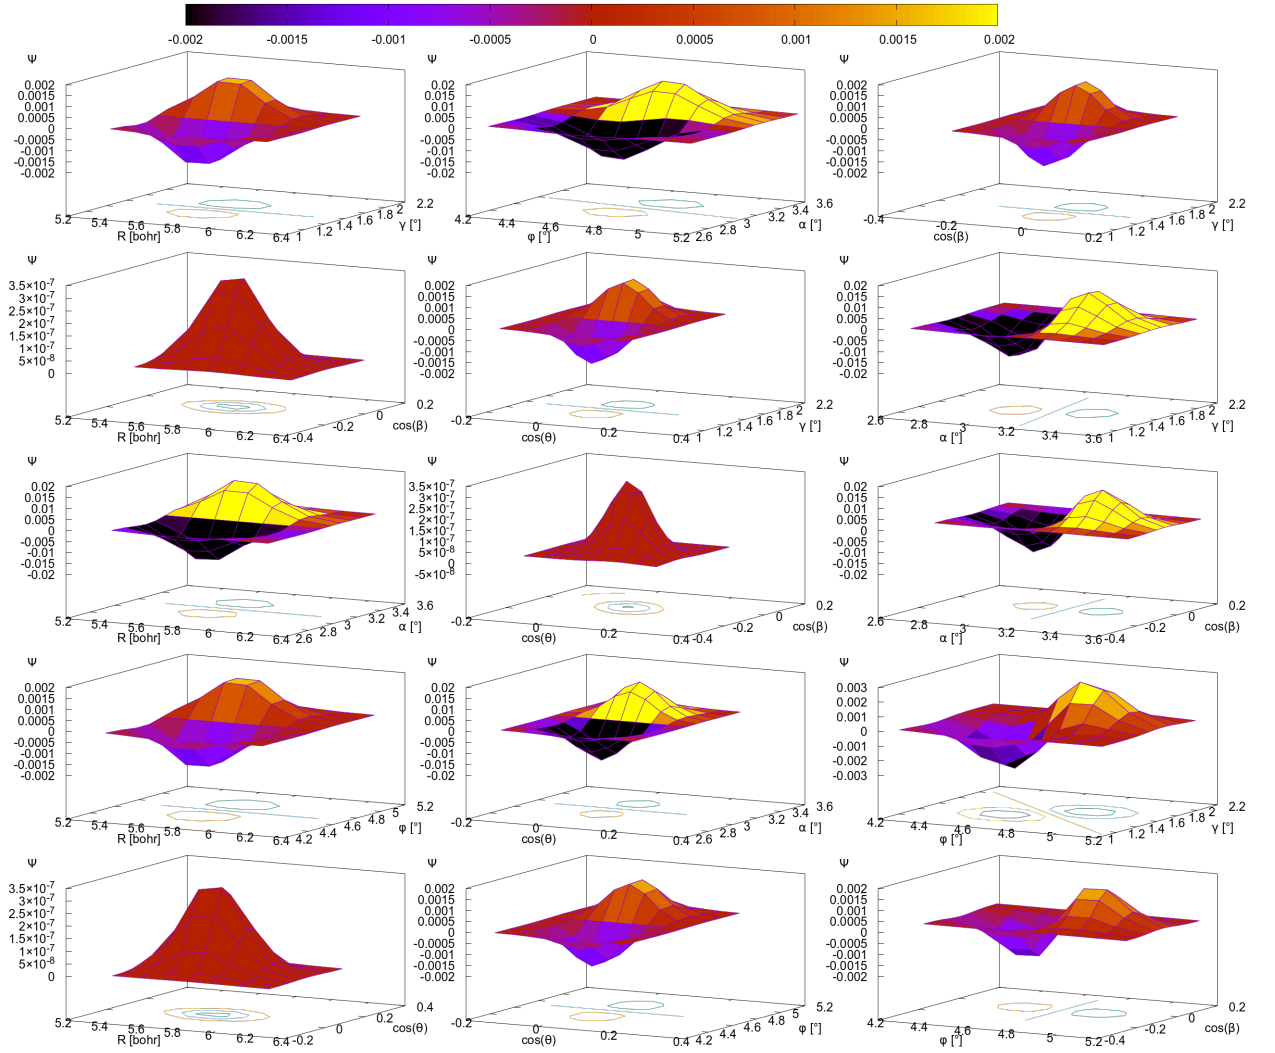

FIG. 2.  $\Psi_1$  with  $\tilde{\nu}_1 - \tilde{\nu}_0 = 70.5 \text{ cm}^{-1}$  (see also caption to Figure 1).

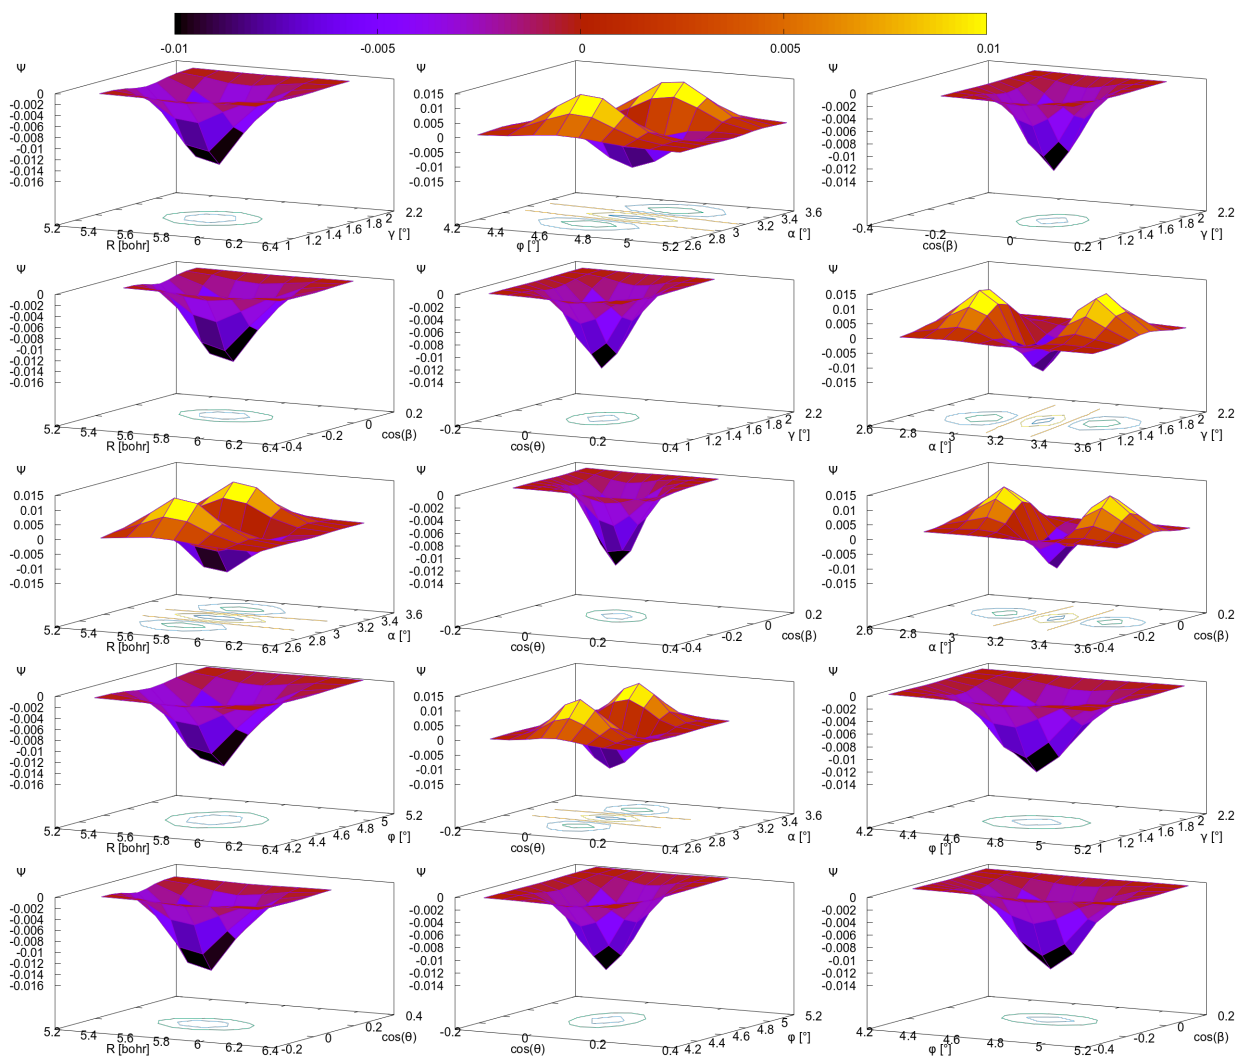

FIG. 3.  $\Psi_2$  with  $\tilde{\nu}_2 - \tilde{\nu}_0 = 140.9 \text{ cm}^{-1}$  (see also caption to Figure 1).



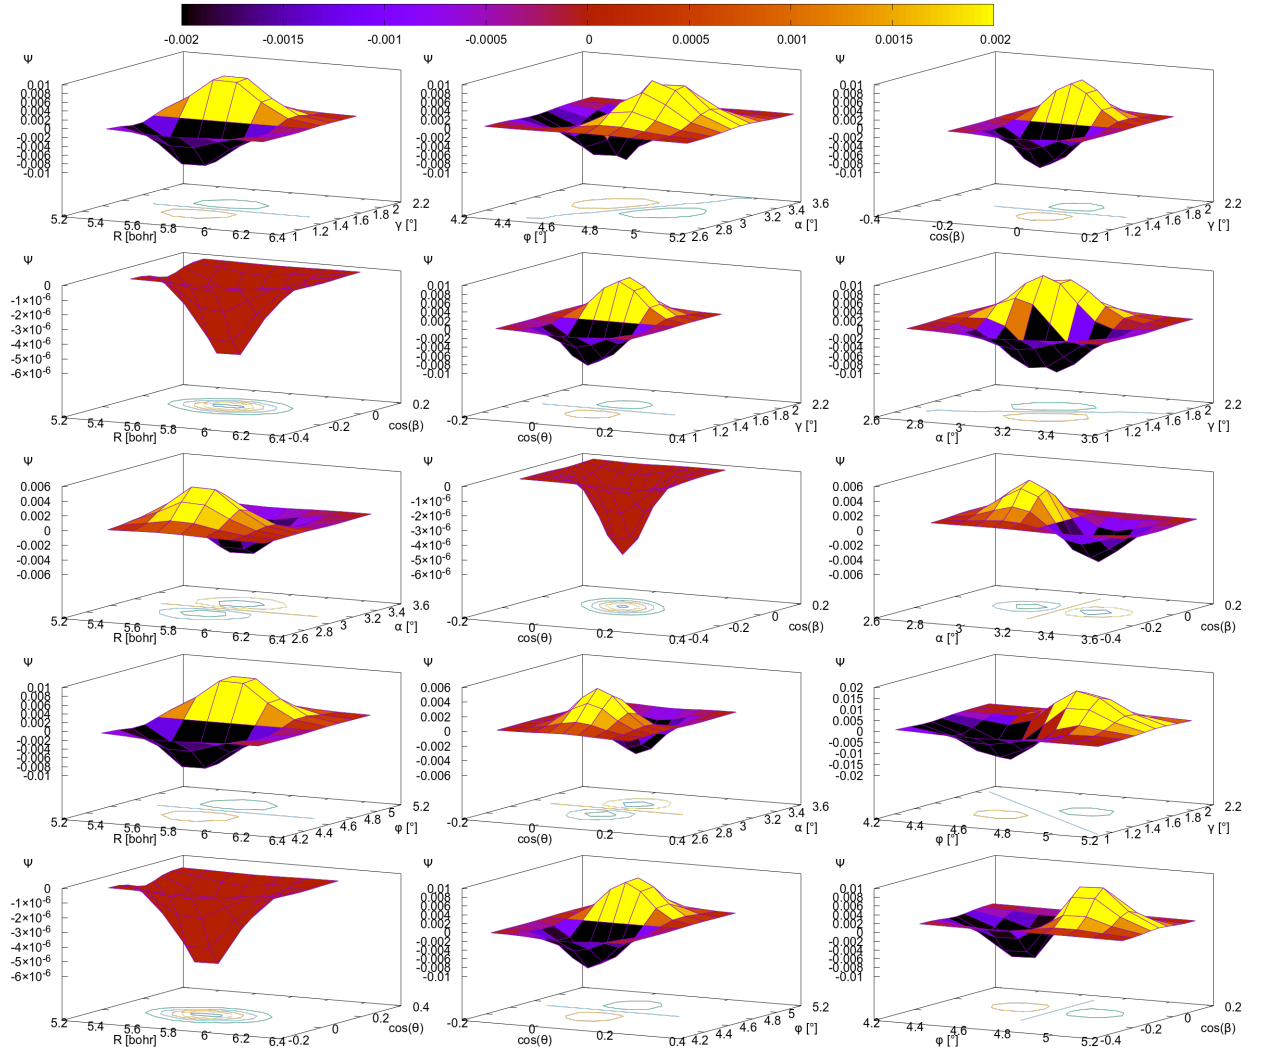

FIG. 4.  $\Psi_3$  with  $\tilde{\nu}_3 - \tilde{\nu}_0 = 162.2 \text{ cm}^{-1}$  (see also caption to Figure 1).

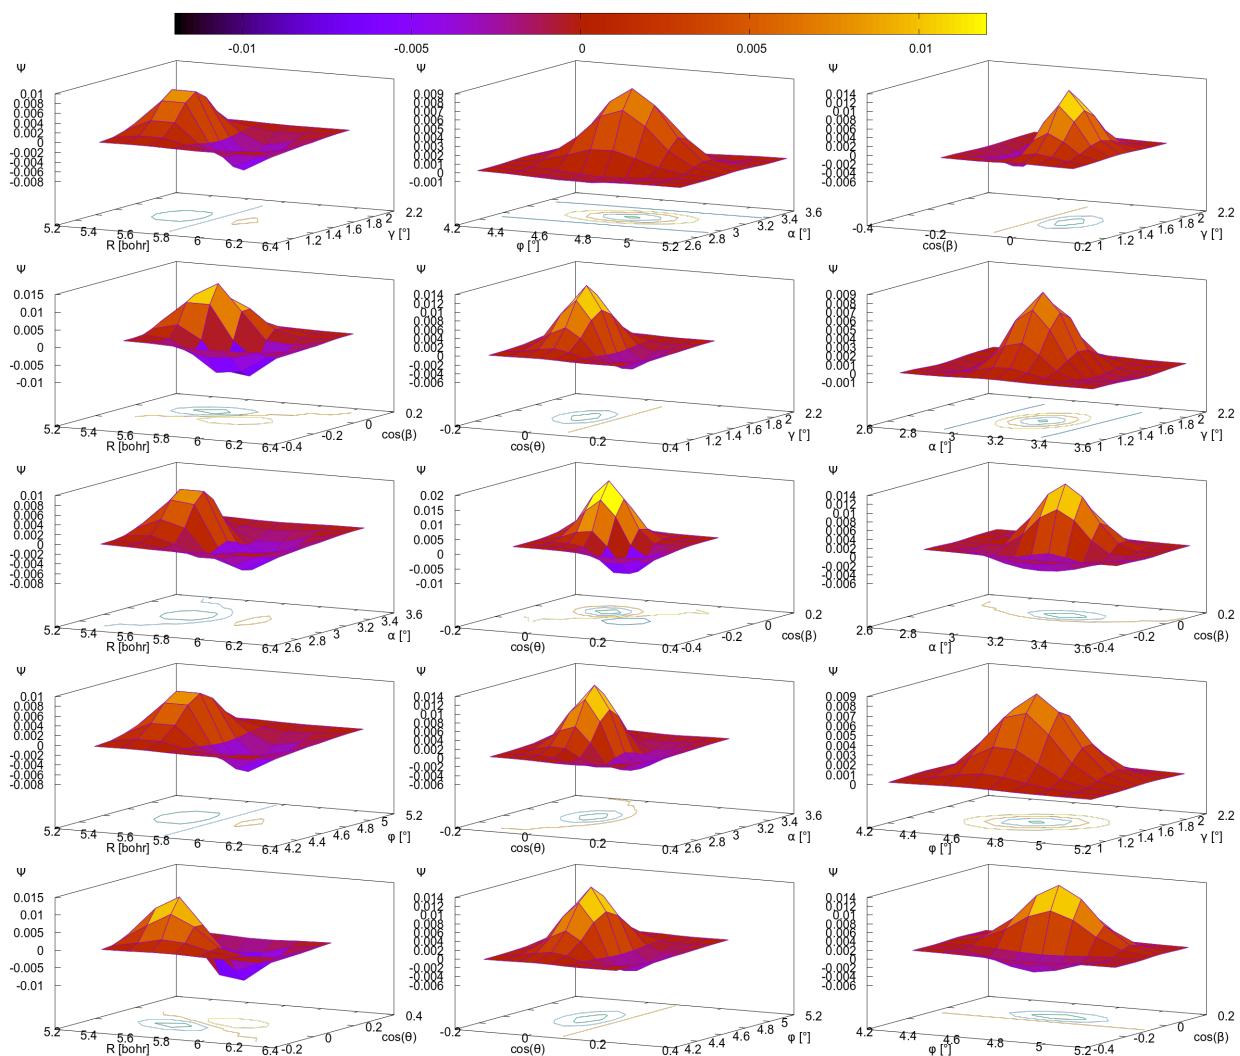

FIG. 5.  $\Psi_4$  with  $\tilde{\nu}_4 - \tilde{\nu}_0 = 191.4 \text{ cm}^{-1}$  (see also caption to Figure 1).

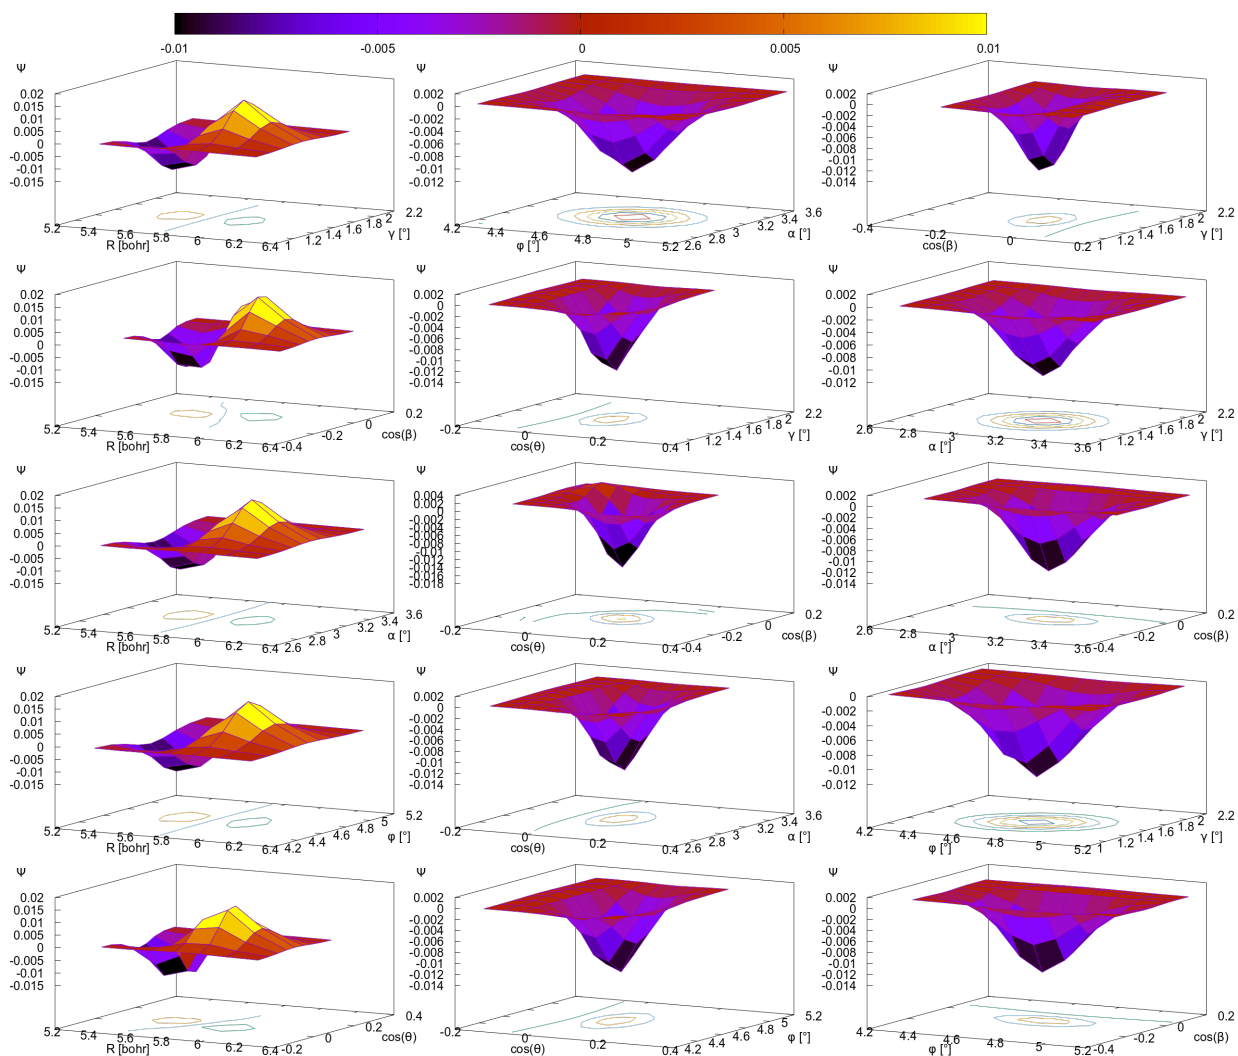

FIG. 6.  $\Psi_5$  with  $\tilde{\nu}_5 - \tilde{\nu}_0 = 207.7 \text{ cm}^{-1}$  (see also caption to Figure 1).

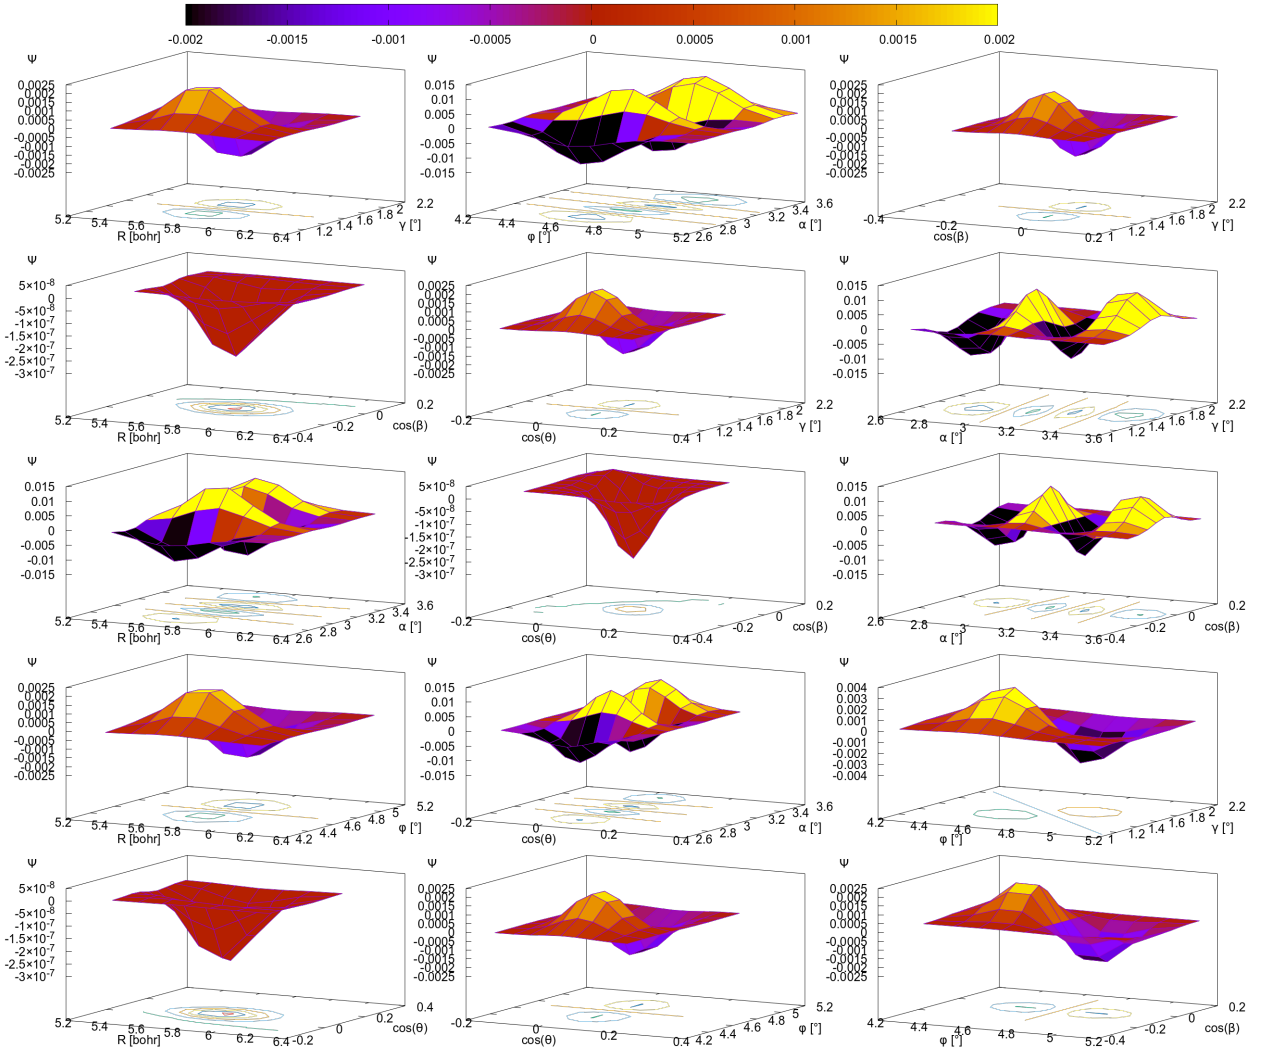

FIG. 7.  $\Psi_6$  with  $\tilde{\nu}_6 - \tilde{\nu}_0 = 211.1 \text{ cm}^{-1}$  (see also caption to Figure 1).

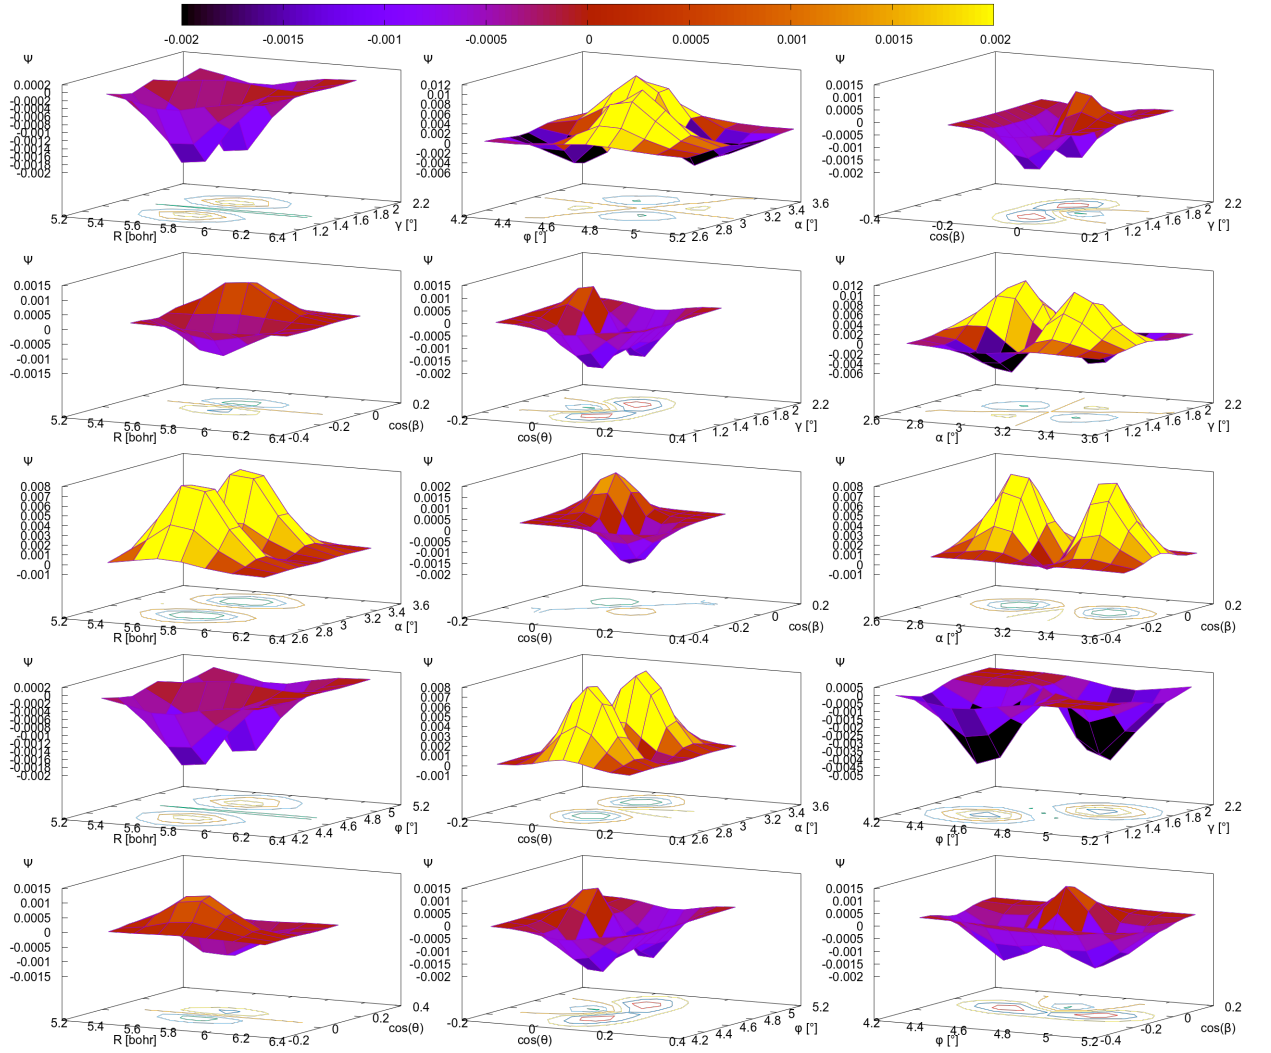

FIG. 8.  $\Psi_7$  with  $\tilde{\nu}_7 - \tilde{\nu}_0 = 232.6 \text{ cm}^{-1}$  (see also caption to Figure 1).

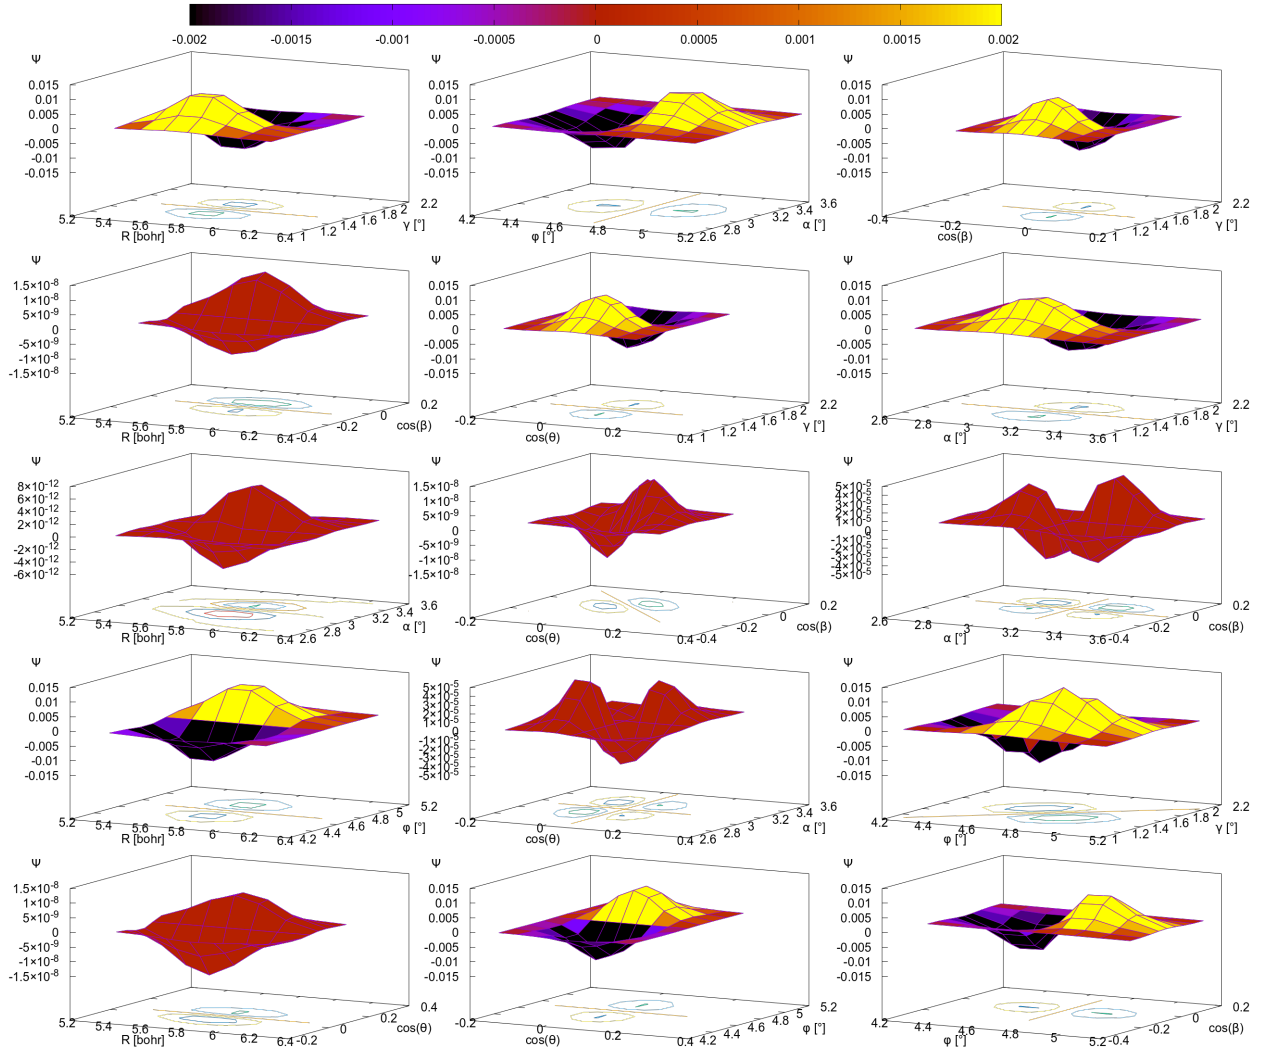

FIG. 9.  $\Psi_8$  with  $\tilde{\nu}_8 - \tilde{\nu}_0 = 239.4 \text{ cm}^{-1}$  (see also caption to Figure 1).

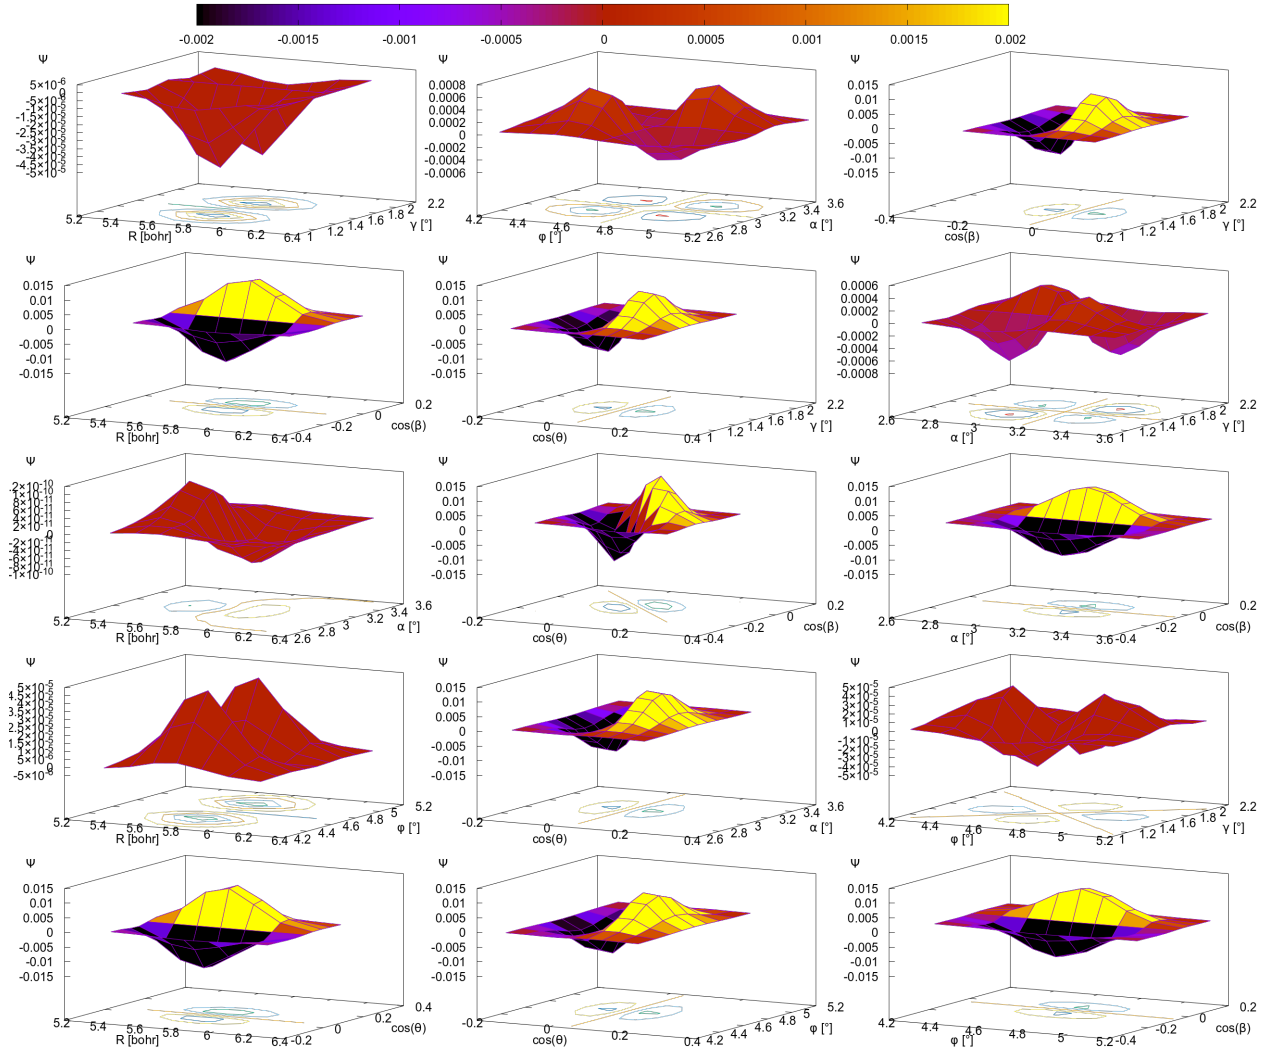

FIG. 10.  $\Psi_9$  with  $\tilde{\nu}_9 - \tilde{\nu}_0 = 253.5 \text{ cm}^{-1}$  (see also caption to Figure 1).

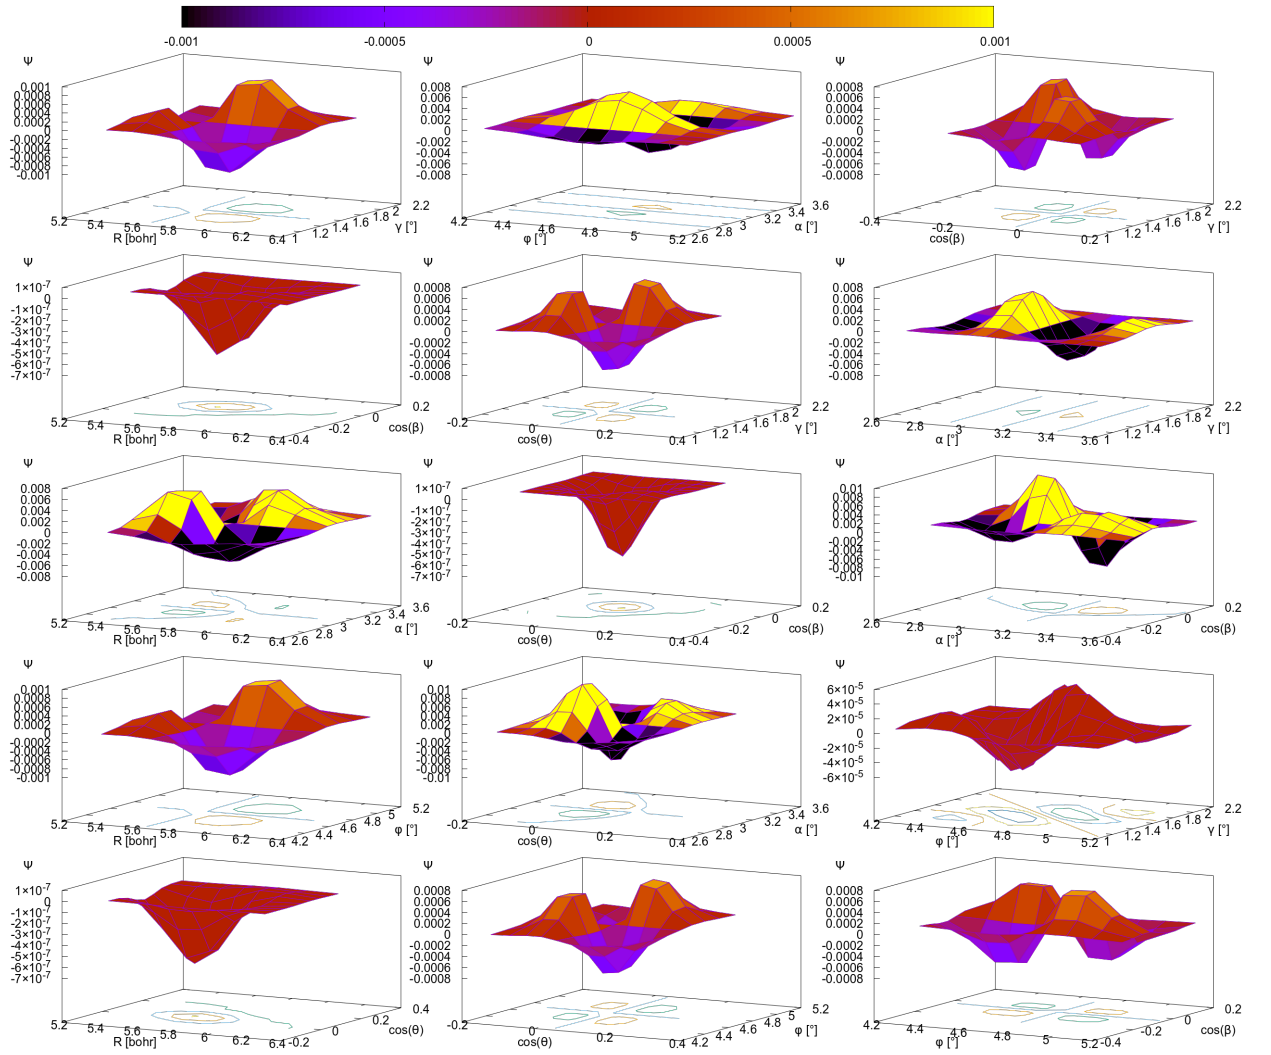

FIG. 11.  $\Psi_{10}$  with  $\tilde{\nu}_{10} - \tilde{\nu}_0 = 262.0 \text{ cm}^{-1}$  (see also caption to Figure 1).



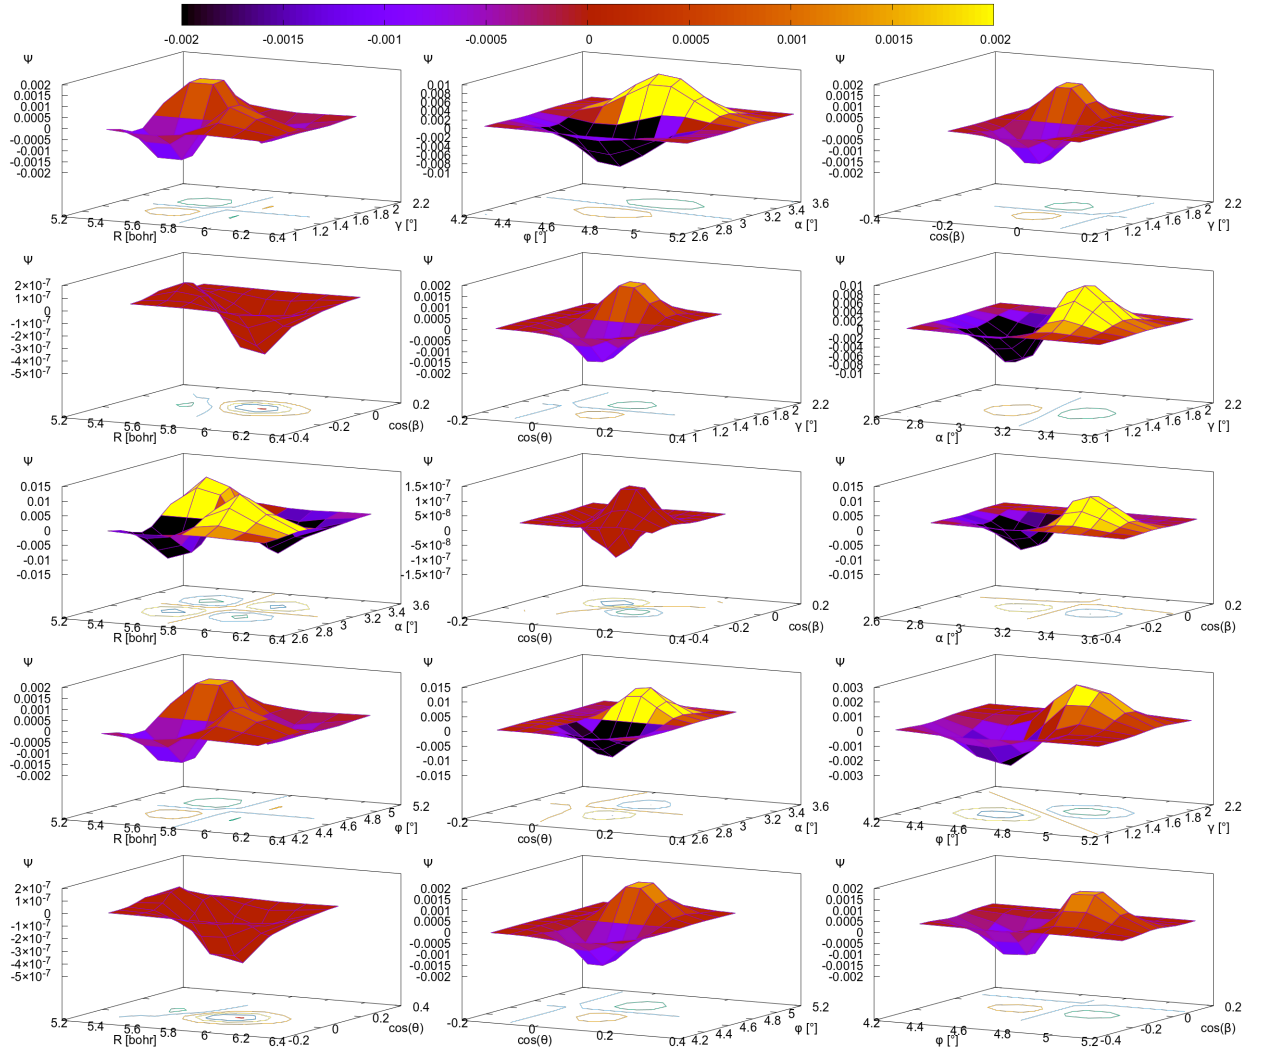

FIG. 12.  $\Psi_{11}$  with  $\tilde{\nu}_{11} - \tilde{\nu}_0 = 277.3 \text{ cm}^{-1}$  (see also caption to Figure 1).

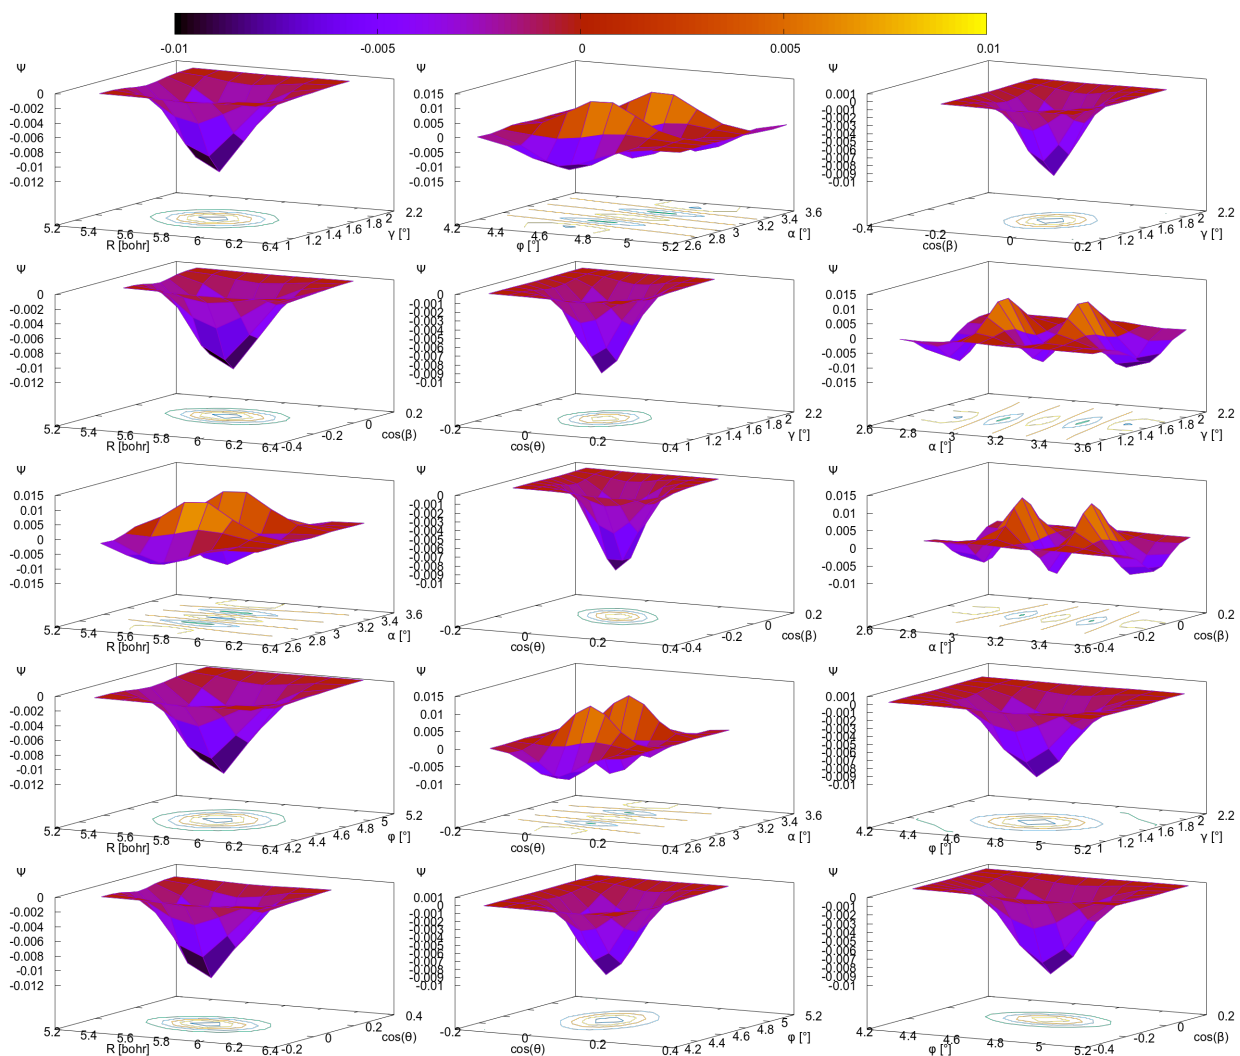

FIG. 13.  $\Psi_{12}$  with  $\tilde{\nu}_{12} - \tilde{\nu}_0 = 280.4 \text{ cm}^{-1}$  (see also caption to Figure 1).

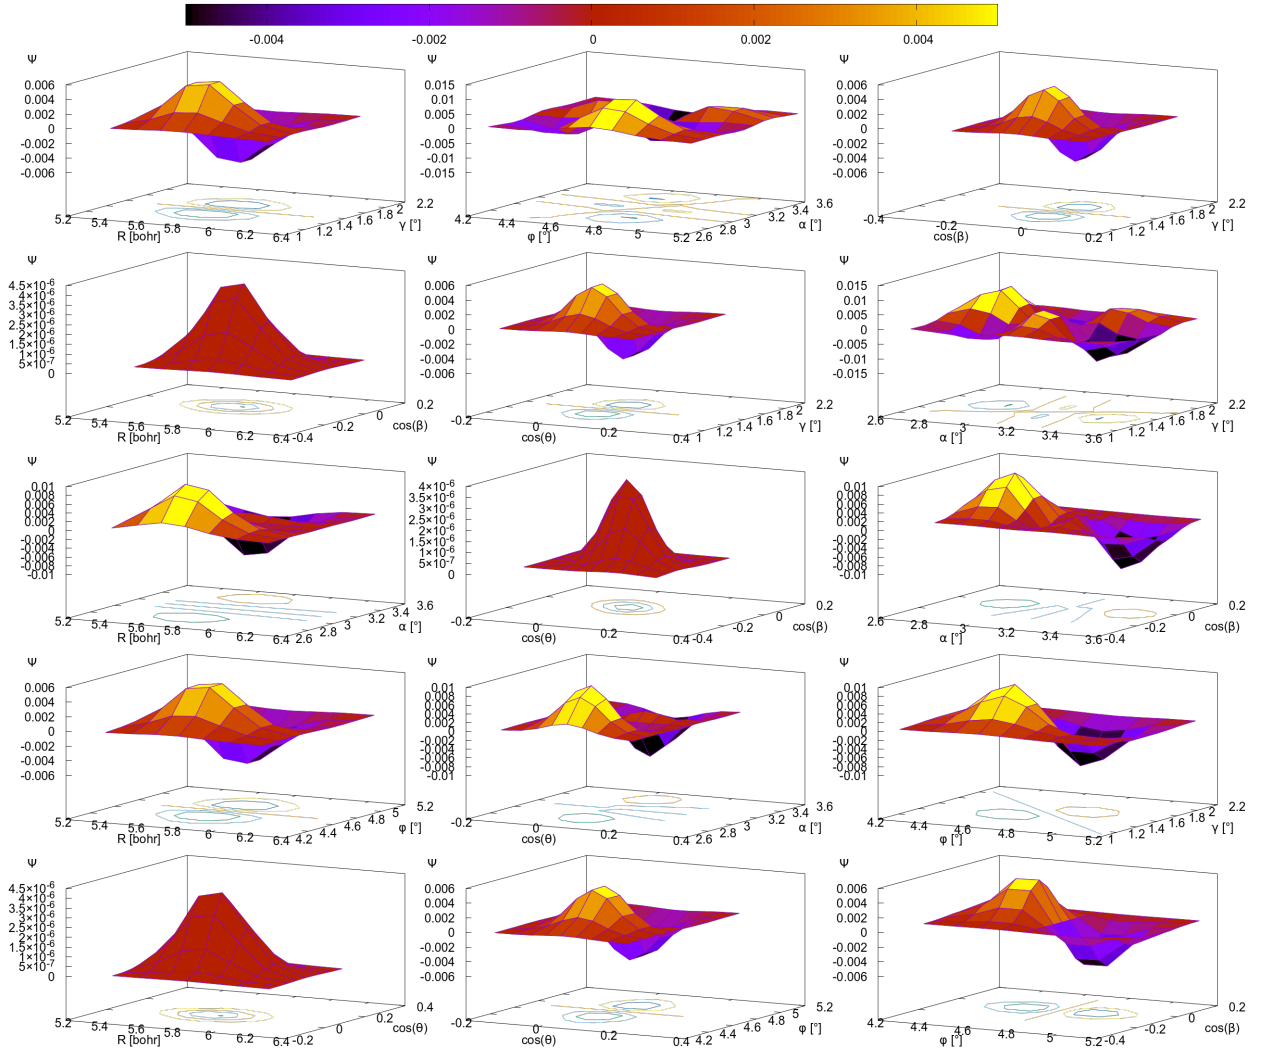

FIG. 14.  $\Psi_{13}$  with  $\tilde{\nu}_{13} - \tilde{\nu}_0 = 302.9 \text{ cm}^{-1}$  (see also caption to Figure 1).

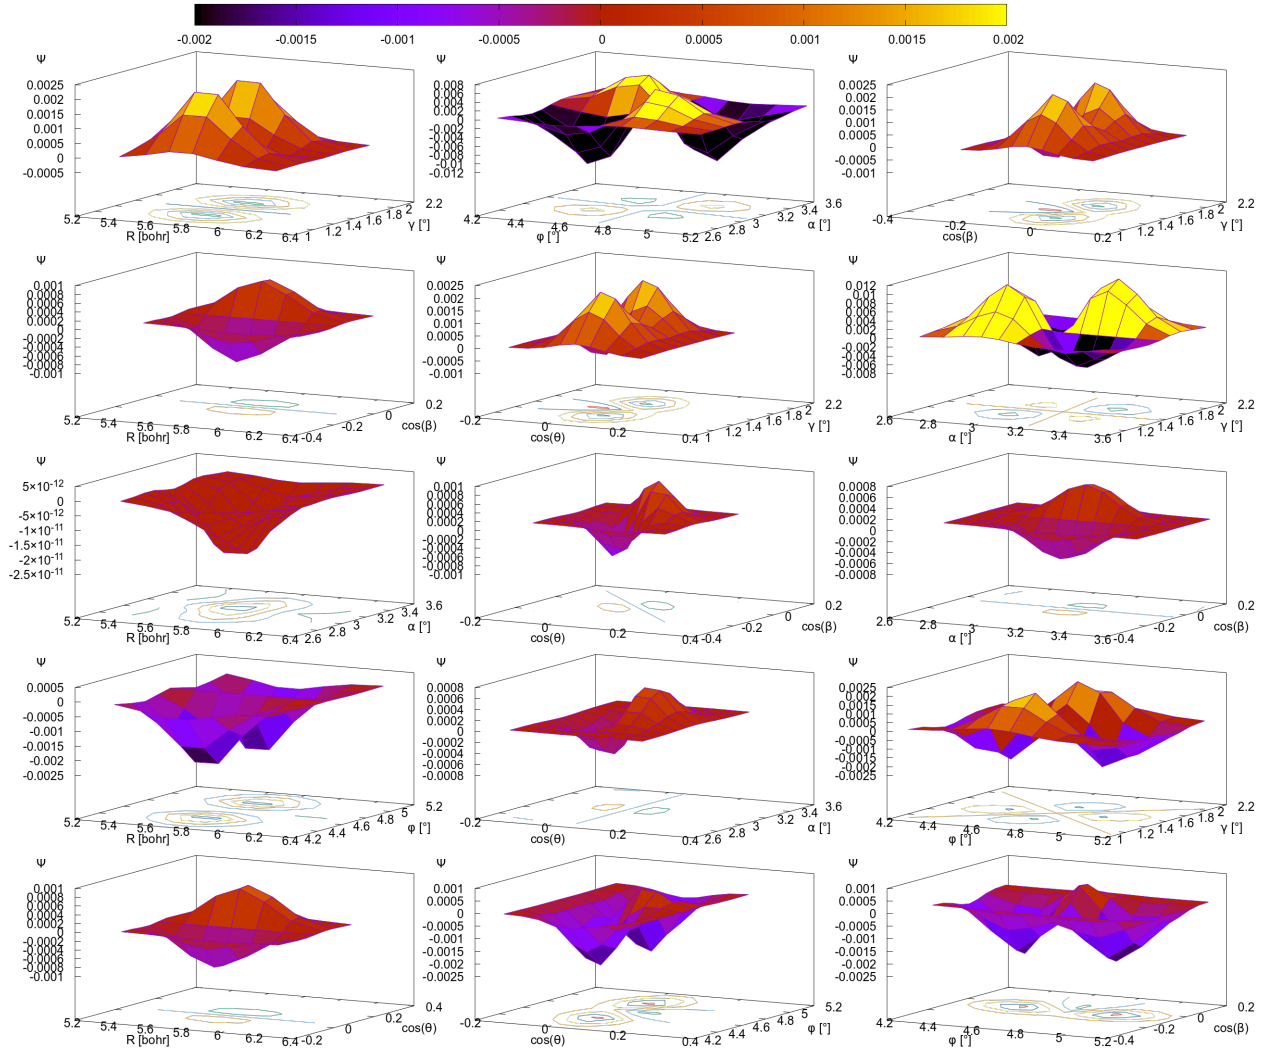

FIG. 15.  $\Psi_{14}$  with  $\tilde{\nu}_{14} - \tilde{\nu}_0 = 309.8 \text{ cm}^{-1}$  (see also caption to Figure 1).
